# Supplementary material for: Relation of Alcohol Intake to Kidney Function and Mortality Observational, Population-Based, Cohort Study
Source: MDPI journal article supplement (doi:10.3390/nu14061297), 2022-03-18
Supplement: s1 [file s1]

---

## SUPPLEMENTARY MATERIALS

**Supplementary Table S1** - Italian standards of volume, alcoholic graduation, alcohol equivalents of alcohol-containing servings.

**Supplementary Table S2** – Simple correlation coefficient of covariates with alcohol intake in 2069 adult examinees with complete data at Exam-1, Exam-2, and Exam-3.

**Supplementary Table S3** – Systolic pressure, diastolic pressure, and antihypertensive drug treatment by exam and stratum of alcohol intake in 2069 adult examinees with complete data at Exam-1, Exam-2, and Exam-3.

**Supplementary Table S4** – Descriptive statistics at Exam-1 in examinees participating in all exams, in examinees dead during follow-up, and in examinees not dead and lost to follow-up.

**Supplementary Table S5** – Cross-sectional analyses: multi-variable linear regression models for data of Exam-1 with eGFR regressed over stratum of alcohol intake and covariates in examinees that did not take part in Exam-2 and/or Exam-3.

**Supplementary Table S6** – Cross-sectional analyses: multi-variable linear regression models with eGFR regressed over alcohol intake and covariates at Exam-1, Exam-2, and Exam-3.

**Supplementary Table S7** – Longitudinal analyses: multi-variable linear regression models with annualized eGFR change and eGFR slope regressed over alcohol intake and covariates.

**Supplementary Table S1** - Italian standards of volume, alcoholic graduation, alcohol equivalents of alcohol-containing servings.

| Beverage             | Volume | Alcoholic graduation | Alcohol equivalents per standard serving |
|----------------------|--------|----------------------|------------------------------------------|
| Wine                 | 125 mL | 12%                  | 11.8 g                                   |
| Beer                 | 333 mL | 5%                   | 13.1 g                                   |
| Aperitif or cocktail | 75 mL  | 20%                  | 11.8 g                                   |
| Spirits or liquors   | 40 mL  | 40%                  | 12.6 g                                   |

Alcohol density = 0.789 g/mL

Società Italiana di Nutrizione Umana (SINU). Livelli di assunzione di riferimento di nutrienti (LARN) – IV Revisione. 2014 - ISBN 978 88 90685 22 4

**Supplementary Table S2** – Simple correlation coefficient of covariates with alcohol intake in 2069 adult examinees with complete data at Exam-1, Exam-2, and Exam-3.

| Covariates in analyses                 | Exam-1               | Exam-2               | Exam-3              |
|----------------------------------------|----------------------|----------------------|---------------------|
| Sex, men/women = 1/0                   | 0.440***             | 0.500***             | 0.505***            |
| Age, year                              | 0.178***             | 0.113***             | 0.078***            |
| Urinary sodium/creatinine ratio        | -0.039 <sup>ns</sup> | -0.083*              | not assessed        |
| Urinary potassium/creatinine ratio     | 0.037                | -0.058**             | not assessed        |
| Urinary urea nitrogen/creatinine ratio | not assessed         | -0.173***            | not assessed        |
| Education, years                       | -0.103***            | -0.081**             | not assessed        |
| Urinary creatinine                     | 0.346***             | 0.405***             | 0.401***            |
| Body mass index                        | 0.109***             | 0.077***             | 0.074***            |
| Systolic pressure                      | 0.073***             | 0.089***             | 0.074***            |
| Diastolic pressure                     | 0.124**              | 0.125***             | 0.036 <sup>ns</sup> |
| On antihypertensive drug, yes/no = 1/0 | 0.005 <sup>ns</sup>  | -0.005 <sup>ns</sup> | 0.019 <sup>ns</sup> |
| Serum total cholesterol                | 0.212***             | 0.133***             | 0.043 <sup>ns</sup> |
| Smoker, yes/no = 1/0                   | 0.176***             | 0.093**              | 0.044*              |
| Diabetes, yes/no = 1/0                 | 0.053*               | 0.027 <sup>ns</sup>  | 0.072***            |

<sup>ns</sup> = not significant ( $P > 0.05$ ); \*  $P < 0.05$ ; \*\*  $P < 0.01$ ; \*\*\*  $P \leq 0.001$

**Supplementary Table S3.** Mean systolic pressure, mean diastolic pressure, and prevalence of antihypertensive drug treatment by exam and stratum of alcohol intake in 2069 adult examinees with complete data at Exam-1, Exam-2, and Exam-3. .

|        |                           | Alcohol intake g/d |       |       |       | P for trend |
|--------|---------------------------|--------------------|-------|-------|-------|-------------|
|        |                           | 0                  | 1-24  | 25-48 | >48   |             |
| Exam-1 | Number of examinees       | 601                | 899   | 230   | 339   |             |
|        | Systolic pressure, mm Hg  | 127                | 125   | 129   | 129   | 0.047       |
|        | Diastolic pressure, mm Hg | 76                 | 75    | 77    | 79    | <0.001      |
|        | Antihypertensive drug, %  | 10.6%              | 8.0%  | 6.1%  | 9.7%  | 0.396       |
| Exam-2 | Number of examinees       | 663                | 565   | 454   | 387   |             |
|        | Systolic pressure, mm Hg  | 123                | 124   | 126   | 128   | <0.001      |
|        | Diastolic pressure, mm Hg | 74                 | 75    | 76    | 78    | <0.001      |
|        | Antihypertensive drug, %  | 15.5%              | 14.9% | 13.4% | 15.0% | 0.591       |

|        |                           |       |       |       |       |       |
|--------|---------------------------|-------|-------|-------|-------|-------|
| Exam-3 | Number of examinees       | 927   | 472   | 401   | 269   |       |
|        | Systolic pressure, mm Hg  | 133   | 134   | 134   | 137   | 0.002 |
|        | Diastolic pressure, mm Hg | 77    | 77    | 76    | 79    | 0.258 |
|        | Antihypertensive drug, %  | 42.1% | 42.8% | 47.9% | 45.0% | 0.111 |

**Supplementary Table S4** – Descriptive statistics at Exam-1 in examinees participating in all exams, in examinees dead during follow-up, and in examinees not dead and lost to follow-up: prevalence for categorical variables, mean for non-skewed variables and median for skewed variables.

|                                       | Participating in all exams | With missing Exam-2 and/or Exam-3 |                   |
|---------------------------------------|----------------------------|-----------------------------------|-------------------|
|                                       |                            | Dead during follow-up             | Lost to follow-up |
| Number of examinees                   | 2069                       | 992                               | 1463              |
| Men, % (n)                            | 42.8%                      | 50.9%                             | 43.5%             |
| Age, years                            | 43                         | 67                                | 46                |
| eGFR, mL/min × 1.73 m <sup>2</sup>    | 91                         | 73                                | 89                |
| Median, g/d                           | 12                         | 12                                | 12                |
| Alcohol intake                        | % with no intake           | 24.9%                             | 28.4%             |
|                                       | % with intake 1-24 g/d     | 40.7%                             | 48.7%             |
|                                       | % with intake 25-48 g/d    | 14.8%                             | 11.8%             |
|                                       | % with intake > 48 g/d     | 19.6%                             | 11.1%             |
| Urinary sodium/creatinine, mmol/g     | 107                        | 146                               | 107               |
| Urinary potassium/creatinine, mmol/g  | 29                         | 35                                | 29                |
| Urinary urea nitrogen/creatinine, g/g | not assessed               | not assessed                      | not assessed      |
| Education, year                       | 7.6                        | 5.0                               | 7.9               |
| Urinary creatinine, g/24-hour         | 1.26                       | 1.16                              | 1.24              |
| Body mass index, kg/m <sup>2</sup>    | 26.1                       | 27.5                              | 26.0              |
| Systolic pressure, mm Hg              | 127                        | 150                               | 134               |
| Diastolic pressure, mm Hg             | 76                         | 79                                | 77                |
| On antihypertensive drug, %           | 8.8%                       | 28.1%                             | 15.4%             |
| Serum total cholesterol, mg/dL        | 206                        | 219                               | 208               |
| Smoker, %                             | 15.6%                      | 25.4%                             | 13.9%             |
| Diabetes, %                           | 1.1%                       | 7.9%                              | 3.7%              |

eGFR = estimated glomerular filtration rate

**Supplementary Table S5** – Cross-sectional analyses: multi-variable linear regression models for data of Exam-1 with eGFR regressed over stratum of alcohol intake and covariates in examinees that did not take part in Exam-2 and/or Exam-3. Regression coefficient (B), 95% confidence interval (*italic*), and P value.

|                              | Number of examinees | Dead during follow-up | Lost to follow-up |
|------------------------------|---------------------|-----------------------|-------------------|
|                              |                     | 992                   | 1463              |
| Habitual alcohol intake, g/d | 0<br>(non-drinker)  | 0<br>(reference)      | 0<br>(reference)  |
|                              |                     | B = 3.051             | B = 2.254         |
|                              |                     | (0.86/5.25)           | (0.44/4.07)       |
|                              |                     | P = 0.006             | P = 0.015         |
|                              | 1 – 24              | B = 4.261             | B = 2.615         |
|                              |                     | (1.46/7.06)           | (-0.05/5.28)      |
|                              |                     | P = 0.003             | P = 0.055         |
|                              | 25 – 48             | B = 6.184             | B = 4.747         |
|                              |                     | (3.44/8.93)           | (1.79/7.71)       |
|                              | > 48                | P < 0.001             | P = 0.002         |

eGFR = estimated glomerular filtration rate

Covariates included in the models = sex and data of Exam-1 for age, education, log-transformed urinary sodium/creatinine ratio, log-transformed urinary potassium/creatinine ratio, urinary creatinine, body mass index, systolic pressure, diastolic pressure, antihypertensive drug treatment, serum total cholesterol, smoking, diabetes.

**Supplementary Table S6** – Cross-sectional analyses: multi-variable linear regression models with eGFR regressed over alcohol intake and covariates at Exam-1, Exam-2, and Exam-3. Standardized regression coefficient (beta), 95% confidence interval (*italic*), P value (asterisks), and adjusted R-squared (R<sup>2</sup>).

|                                                 |                 | Dependent variable                   |                                      |                                       |
|-------------------------------------------------|-----------------|--------------------------------------|--------------------------------------|---------------------------------------|
| Independent variables                           |                 | Exam-1 eGFR                          | Exam-2 eGFR                          | Exam-1 eGFR                           |
|                                                 | 0 (non-drinker) | reference                            | reference                            | reference                             |
| Habitual alcohol intake, g/d                    | 1 – 24          | 0.012 <sup>ns</sup><br>(-0.03/0.05)  | -0.011 <sup>ns</sup><br>(-0.05/0.02) | -0.020 <sup>ns</sup><br>(-0.05/0.01)  |
|                                                 | 25 – 48         | 0.078***<br>(0.04/0.12)              | 0.044 *<br>(0.01/0.08)               | 0.014 <sup>ns</sup><br>(-0.02/0.04)   |
|                                                 | > 48            | 0.123 ***<br>(0.08/0.17)             | 0.093 ***<br>(0.05/0.13)             | 0.053 ***<br>(0.02/0.09)              |
|                                                 |                 |                                      |                                      |                                       |
| Sex, men/women = 1/0                            |                 | 0.372 ***<br>(0.23/0.52)             | 0.371 ***<br>(0.25/0.50)             | 0.384 ***<br>(0.28/0.49)              |
| Age, years                                      |                 | -0.666 ***<br>(-0.74/-0.60)          | -0.786 ***<br>(-0.85/-0.72)          | -0.812 ***<br>(-0.86/-0.76)           |
| Education, years                                |                 | -0.041 <sup>ns</sup><br>(-0.08/0.01) | -0.087 ***<br>(-0.13/-0.05)          | not assessed                          |
| Urinary sodium/creatinine ratio, log mmol/g     |                 | 0.029 <sup>ns</sup><br>(-0.01/0.07)  | 0.039 *<br>(0.01/0.08)               | not assessed                          |
| Urinary potassium/creatinine ratio, log mmol/g  |                 | -0.014 <sup>ns</sup><br>(-0.05/0.03) | 0.030 <sup>ns</sup><br>(-0.01/0.07)  | not assessed                          |
| Urinary urea nitrogen/creatinine ratio, log g/g |                 | not assessed                         | 0.131 ***<br>(0.10/0.17)             | not assessed                          |
| Urinary creatinine, g/d                         |                 | -0.299 ***<br>(-0.46/-0.13)          | -0.152 *<br>(-0.30/-0.01)            | -0.213***<br>(-0.34/-0.09)            |
| Body mass index, kg/m²                          |                 | 0.109 **<br>(0.03/0.19)              | 0.098 **<br>(0.03/0.17)              | 0.082 **<br>(0.02/0.14)               |
| Systolic pressure, mm Hg                        |                 | 0.031 <sup>ns</sup><br>(-0.02/0.08)  | 0.062 **<br>(0.02/0.11)              | 0.054 **<br>(0.02/0.09)               |
| Diastolic pressure, mm Hg                       |                 | -0.038 <sup>ns</sup><br>(-0.09/0.01) | -0.064 **<br>(-0.11/-0.02)           | -0.043 *<br>(-0.08/-0.01)             |
| Antihypertensive drug treatment, yes/no=1/0     |                 | -0.26 <sup>ns</sup><br>(-0.06/0.01)  | -0.036 *<br>(-0.07/-0.01)            | -0.056 ***<br>(-0.09/-0.03)           |
| Serum total cholesterol, mg/100 mL              |                 | -0.087 ***<br>(-0.13/-0.05)          | -0.063 ***<br>(-0.10/-0.03)          | -0.036 **<br>(-0.06/-0.01)            |
| Smoking, yes/no=1/0                             |                 | 0.001 <sup>ns</sup><br>(-0.04/0.04)  | -0.007 <sup>ns</sup><br>(-0.04/0.02) | -0.013 <sup>ns</sup><br>(-0.004/0.01) |
| Diabetes, yes/no=1/0                            |                 | -0.010 <sup>ns</sup><br>(-0.04/0.02) | 0.032 *<br>(0.01/0.06)               | 0.031 *<br>(0.01/0.06)                |
| Adjusted R²                                     |                 | 0.384                                | 0.533                                | 0.625                                 |

eGFR = estimated glomerular filtration rate

<sup>ns</sup> = not significant (P>0.05); \* P < 0.05; \*\* P < 0.01; \*\*\* P ≤ 0.001

**Supplementary Table S7** – Longitudinal analyses: multi-variable linear regression models with annualized eGFR change and eGFR slope regressed over alcohol intake and covariates. Standardized regression coefficient (beta), 95% confidence interval (*italic*), P value (asterisks), and adjusted R-squared (R<sup>2</sup>).

| Independent variables                           | Dependent variable                |                                   |                                  |
|-------------------------------------------------|-----------------------------------|-----------------------------------|----------------------------------|
|                                                 | eGFR change from Exam-1 to Exam-2 | eGFR change from Exam-2 to Exam-3 | eGFR slope from Exam-1 to Exam-3 |
|                                                 | Model 1                           | Model 2                           | Model 3                          |
|                                                 | 0                                 | 0                                 | 0                                |
|                                                 | (non-drinker)                     | (reference)                       | (reference)                      |
| Habitual alcohol intake, g/d                    | 0.010 <sup>ns</sup>               | -0.023 <sup>ns</sup>              | -0.004 <sup>ns</sup>             |
|                                                 | (-0.02/0.04)                      | (-0.06/0.02)                      | (-0.04/0.03)                     |
|                                                 | 0.010 <sup>ns</sup>               | -0.016 <sup>ns</sup>              | 0.019 <sup>ns</sup>              |
|                                                 | (-0.02/0.04)                      | (-0.06/0.02)                      | (-0.02/0.06)                     |
|                                                 | 0.065 <sup>***</sup>              | 0.050 <sup>*</sup>                | 0.064 <sup>**</sup>              |
|                                                 | (0.03/0.10)                       | (0.01/0.10)                       | (0.02/0.10)                      |
| Sex, men/women = 1/0                            | 0.248 <sup>***</sup>              | 0.325 <sup>***</sup>              | 0.346 <sup>***</sup>             |
|                                                 | (0.13/0.37)                       | (0.18/0.47)                       | (0.23/0.46)                      |
| Age, years                                      | -0.553 <sup>***</sup>             | -0.781 <sup>***</sup>             | -0.760 <sup>***</sup>            |
|                                                 | (-0.62/0.49)                      | (-0.86/-0.70)                     | (-0.82/-0.70)                    |
| eGFR, mL/min x 1.73 m <sup>2</sup>              | -0.951 <sup>***</sup>             | -0.772 <sup>***</sup>             | -0.965 <sup>***</sup>            |
|                                                 | (-0.99/-0.92)                     | (-0.82/-0.72)                     | (-1.00/-0.93)                    |
| Education, years                                | -0.055 <sup>**</sup>              | 0.024 <sup>ns</sup>               | 0.019 <sup>ns</sup>              |
|                                                 | (-0.09/-0.02)                     | (-0.02/0.07)                      | (-0.02/0.05)                     |
| Urinary sodium/creatinine ratio, log mmol/g     | 0.008 <sup>ns</sup>               | -0.064 <sup>**</sup>              | -0.037 <sup>*</sup>              |
|                                                 | (-0.02/0.04)                      | (-0.11/0.02)                      | (-0.08/-0.01)                    |
| Urinary potassium/creatinine ratio, log mmol/g  | 0.046 <sup>**</sup>               | 0.049 <sup>*</sup>                | 0.047 <sup>**</sup>              |
|                                                 | (0.01/0.08)                       | (0.01/0.09)                       | (-0.01/0.08)                     |
| Urinary urea nitrogen/creatinine ratio, log g/g | not assessed                      | 0.042 <sup>*</sup>                | -0.037 <sup>*</sup>              |
|                                                 |                                   | (-0.02/0.14)                      | (-0.07/-0.01)                    |
| Urinary creatinine, g/d                         | -0.091 <sup>ns</sup>              | -0.178 <sup>*</sup>               | 0.211 <sup>**</sup>              |
|                                                 | (-0.23/0.05)                      | (-0.35/-0.01)                     | (-0.35/-0.08)                    |
| Body mass index, kg/m <sup>2</sup>              | 0.087 <sup>**</sup>               | 0.062 <sup>ns</sup>               | 0.083 <sup>**</sup>              |
|                                                 | (0.02/0.15)                       | (-0.02/0.14)                      | (0.02/0.15)                      |
| Systolic pressure, mm Hg                        | 0.014 <sup>ns</sup>               | 0.002 <sup>ns</sup>               | 0.059 <sup>**</sup>              |
|                                                 | (-0.03/0.05)                      | (-0.05/0.05)                      | (0.02/0.10)                      |
| Diastolic pressure, mm Hg                       | 0.001 <sup>ns</sup>               | -0.027 <sup>ns</sup>              | -0.039 <sup>*</sup>              |
|                                                 | (-0.04/0.04)                      | (-0.07/0.02)                      | (-0.08/0.01)                     |
| Antihypertensive drug treatment, yes/no=1/0     | -0.018 <sup>ns</sup>              | -0.013 <sup>ns</sup>              | -0.051 <sup>**</sup>             |
|                                                 | (-0.05/0.01)                      | (-0.05/0.02)                      | (-0.09/-0.02)                    |
| Serum total cholesterol, mg/100 mL              | 0.014 <sup>ns</sup>               | 0.015 <sup>ns</sup>               | 0.012 <sup>ns</sup>              |
|                                                 | (-0.02/0.05)                      | (-0.02/0.05)                      | (-0.02/0.04)                     |
| Smoking, yes/no=1/0                             | -0.010 <sup>ns</sup>              | -0.025 <sup>ns</sup>              | -0.015 <sup>ns</sup>             |
|                                                 | (-0.04/0.02)                      | (-0.06/0.01)                      | (-0.04/0.01)                     |
| Diabetes, yes/no=1/0                            | 0.018 <sup>ns</sup>               | -0.025 <sup>ns</sup>              | 0.016 <sup>ns</sup>              |
|                                                 | (-0.01/0.05)                      | (-0.06/0.01)                      | (-0.01/0.04)                     |
| Adjusted R <sup>2</sup>                         | 0.586                             | 0.389                             | 0.605                            |

<sup>ns</sup> = not significant (P>0.05); \* P < 0.05; \*\* P < 0.01; \*\*\* P ≤ 0.001

Covariates included in Model 1 = sex and data at Exam-1 of age, eGFR, education, log-transformed urinary sodium/creatinine ratio, log-transformed urinary potassium/creatinine ratio, urinary creatinine, body mass index, systolic pressure, diastolic pressure, antihypertensive drug treatment, serum total cholesterol, smoking, and diabetes.

Covariates included in Model 2 = sex and data at Exam-2 of age, eGFR, education, log-transformed urinary sodium/creatinine ratio, log-transformed urinary potassium/creatinine ratio, log-transformed urinary urea nitrogen/creatinine ratio, urinary creatinine, body mass index, systolic pressure, diastolic pressure, antihypertensive drug treatment, serum total cholesterol, smoking, and diabetes.

Covariates included in Model 3 = sex, age, eGFR, antihypertensive drug treatment, smoking, and diabetes at Exam-1, and means of data available from Exam-1 to Exam-3 for education, log-transformed urinary sodium/creatinine ratio (not measured at Exam-3), log-transformed urinary potassium/creatinine ratio (not measured at Exam-3), log-transformed urinary urea nitrogen/creatinine ratio (measured at Exam-2 only), urinary creatinine, body mass index, systolic pressure, diastolic pressure, serum total cholesterol.
